# Supplementary material
Source: PubMed Central journal article supplement (PMC4856042)
Supplement: NIHMS780236-supplement-SI.pdf [file NIHMS780236-supplement-SI.pdf]

Small Molecule Targeting of a MicroRNA Associated with Hepatocellular  
Carcinoma in Cellulo

Jessica L. Childs-Disney and Matthew D. Disney\*

Department of Chemistry, The Scripps Research Institute, Scripps Florida, 130 Scripps  
Way #3A1, Jupiter, FL 33458 USA

\*To whom correspondence is addressed; Email: [Disney@scripps.edu](mailto:Disney@scripps.edu)

Key words: Chemical Biology, Precision Medicine, RNA, Nucleic Acids, Medicinal  
Chemistry

## SUPPLEMENTARY TABLES AND FIGURES

**Supplementary Table 1:** qRT-PCR primers used to amplify pri-, pre, and mature miR-525 and optimized thermocycling conditions

| RNA               | Forward Primer              | Reverse Primer                                  | Cycling Conditions                                   |
|-------------------|-----------------------------|-------------------------------------------------|------------------------------------------------------|
| pri-miR-525       | 5'-GGGGTTTATGTTCTGGAT TCCAG | 5'-CAGAAACCCACCATCATCCAAGTC                     | 95 °C for 15 s, 52.3 °C for 30 s,<br>72 °C for 1 min |
| pre-miR-525       | 5'-CTCTCCAGAGGGATGCACTTTCTC | 5'- CTCTAAAGGGAAGCGCCTTCTTT                     | 95 °C for 15 s, 62.8 °C for 30 s,<br>72 °C for 1 min |
| mature miR-525-5p | 5'-CTCCAGAGGGATGCACTTTCT    | 5'- GAATCGAGCACCAGTTACGC<br>(universal reverse) | 95 °C for 15 s, 65.5 °C for 30 s,<br>72 °C for 1 min |
| U6                | 5'- ACACGCAAATTCGTGAAGCGTTC | 5'- GAATCGAGCACCAGTTACGC<br>(universal reverse) | 95 °C for 15 s, 60 °C for 1 min                      |

| <b>Supplementary Table 2:</b> Primers used for miRNAs in profiling studies and housekeeping genes used for normalization. |                           |
|---------------------------------------------------------------------------------------------------------------------------|---------------------------|
| hsa-miR-214                                                                                                               | ACAGCAGGCACAGACAGGCAGT    |
| hsa-miR-194                                                                                                               | TGTAACAGCAACTCCATGTGGA    |
| hsa-miR-196a                                                                                                              | TAGGTAGTTTCATGTTGTTGGG    |
| hsa-miR-196b                                                                                                              | TAGGTAGTTTCCTGTTGTTGGG    |
| hsa-miR-24                                                                                                                | TGGCTCAGTTCAGCAGGAACAG    |
| hsa-miR-187                                                                                                               | TCGTGTCTTGTGTTGCAGCCGG    |
| hsa-miR-185                                                                                                               | TGGAGAGAAAGGCAGTTCCTGA    |
| hsa-miR-132                                                                                                               | TAACAGTCTACAGCCATGGTCG    |
| hsa-miR-186                                                                                                               | CAAAGAATTCTCCTTTTGGGCT    |
| hsa-miR-23b                                                                                                               | ATCACATTGCCAGGGATTACC     |
| hsa-miR-23a                                                                                                               | ATCACATTGCCAGGGATTTCC     |
| hsa-miR-449a                                                                                                              | TGGCAGTGTATTGTTAGCTGGT    |
| hsa-miR-34a                                                                                                               | TGGCAGTGTCTTAGCTGGTTGT    |
| hsa-miR-34c-5p                                                                                                            | AGGCAGTGTAGTTAGCTGATTGC   |
| hsa-miR-27a                                                                                                               | TTCACAGTGGCTAAGTTCCGC     |
| hsa-miR-129-5p                                                                                                            | CTTTTTGCGGTCTGGGCTTGC     |
| hsa-miR-27b                                                                                                               | TTCACAGTGGCTAAGTTCTGC     |
| hsa-miR-7                                                                                                                 | TGGAAGACTAGTGATTTTGTGTTGT |
| hsa-miR-326                                                                                                               | TGGGCCCTTCCTCCAGAA        |
| SNORD48                                                                                                                   | CCCCAGGTAACTCTTGAGTGT     |
| SNORD47                                                                                                                   | TAATGATATCACTGTAAAACC     |
| SNORD44                                                                                                                   | ATGCTGACTGAACATGAAGGTC    |
| RNT6-2                                                                                                                    | ACACGCAAATTCGTGAAGCGTTC   |

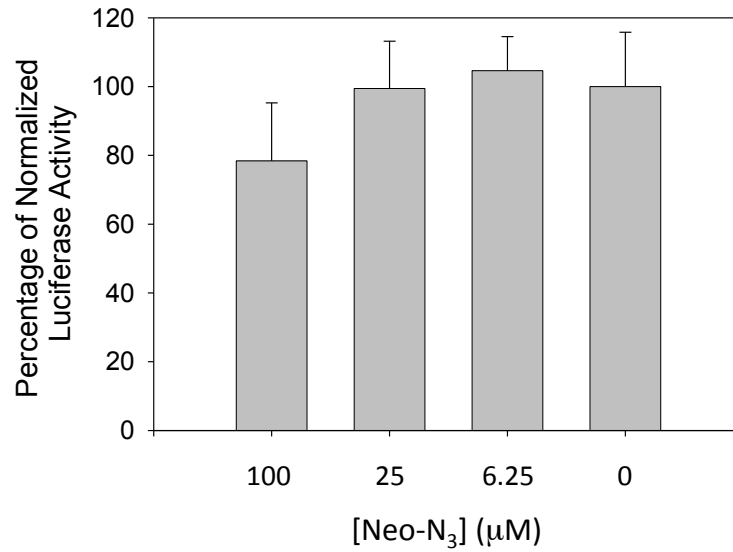

**Supplementary Figure 1:** Neo-N<sub>3</sub> does not cause significant global changes in protein expression as measured by a luciferase reporter at concentrations that affect miR-525 biogenesis (25 µM). These results indicate that the ribosome is not a significant off-target.
